# Supplementary material
Source: HighWire-hosted journal article supplement (https://www.cmajopen.ca/content/suppl/2013/10/22/1.4.E127)
Supplement: open-2013-0006-original-submission.pdf [file open-2013-0006-original-submission.pdf]

# Prescribed targets for vasopressor titration in septic shock: a retrospective cohort study

Charles St-Arnaud<sup>1</sup>, Jean-François Éthier<sup>1</sup>, Cindy Hamielec<sup>2</sup>, Andrew Bersten<sup>3</sup>, Gordon Guyatt<sup>4</sup>,  
Maureen Meade<sup>4</sup>, Qi Zhou<sup>4</sup>, Marc-André Leclair<sup>1</sup>, Alpesh Patel<sup>3</sup>, François Lamontagne<sup>5</sup>.

<sup>1</sup> Centre Hospitalier Universitaire de Sherbrooke, Sherbrooke, Canada

<sup>2</sup> Hamilton Health Sciences, Hamilton, Canada

<sup>3</sup> Flinders Medical Centre, Adelaide, Australia

<sup>4</sup> McMaster University, Hamilton, Canada

<sup>5</sup> Centre de Recherche Étienne-Le Bel, Université de Sherbrooke, Sherbrooke, Canada

## Author contact

François Lamontagne

Service de Médecine Interne

3001 12e avenue Nord

Sherbrooke, Québec, Canada

J1H 5N4

Tel: 819-346-1110 ext 14977

Fax: 819-820-6406

email: francois.lamontagne@usherbrooke.ca

No reprints required.

Keywords: Vasopressors, shock, titration, blood pressure, mean arterial pressure

Word count

Manuscript: 2384 words

Funding: none

## Abstract

**Background:** Without robust clinical evidence to guide vasopressor titration in septic shock, it is unclear who adjusts the dosing of these potent medications and how. We hypothesized that explicit blood pressure targets would be missing from half of the vasopressor prescriptions in participating centers.

**Methods:** We conducted a multicenter, retrospective cohort study in 9 university-affiliated intensive care units (ICU) located in 3 academic hospitals in Canada and Australia. We reviewed charts of consecutive patients 18 years or older and admitted to the ICU for a presumptive diagnosis of sepsis. Other inclusion criteria were hypotension (systolic arterial pressure  $\leq$  90 mmHg or mean arterial pressure  $\leq$  65 mmHg) and continuous infusion of vasopressors for at least one hour within the initial 48 hours of ICU stay, the period of observation for this study.

**Results:** We included data from 369 patient charts. At least 1 target was specified in 99% of cases. The most common targets were mean arterial pressures (MAP - 73%). The median initial MAP target was 65 mmHg (range 55 to 90 mmHg). In a multivariable linear regression model, older age and center were associated with higher initial MAP targets. In 40% of patients, the treating team modified the initial target at least once.

**Interpretation:** When prescribing vasopressors to patients with septic shock, intensivists nearly always specify explicit targets. Age and local standards appear to influence targeted blood pressures and physicians frequently modify initial targets. Defining optimal vasopressor titration strategies adapted to individual patient characteristics demands randomized controlled trials.

## Introduction:

Severe sepsis and septic shock are frequently encountered pathologies and their incidence is rising in modern intensive care units (ICU)(1, 2). With septic shock, hemodynamic instability ensues, leading to a state of circulatory failure that persists despite fluid resuscitation. In healthy individuals, autoregulation maintains blood flow to vascular beds despite variations in arterial pressure. In septic shock, based on animal studies of limited clinical relevance(3), a widespread pathophysiological model suggests that blood pressure may decrease to a critical level below which tissue perfusion becomes linearly dependant on arterial pressure(4-6). The rationale underlying vasopressor therapy in this context is to increase arterial blood pressure in order to restore and maintain adequate tissue perfusion. However, the specific blood pressure threshold below which perfusion is compromised, and the ideal target for vasopressor titration are not known. Drawing on expert opinions, current guidelines issued by the “Surviving Sepsis Campaign” recommend a minimal mean arterial pressure (MAP) of 65 mmHg in septic shock(5-7). However, no study has shown that targeting a MAP above 65 mmHg as opposed to another blood pressure value was beneficial (8-11). Accordingly, the optimal blood pressure value could vary for different patients and depend on which organ systems are monitored. Without robust clinical evidence to guide vasopressor titration in septic shock, it is unclear who adjusts the dosing of these potent medications. Moreover, given the lack of conclusive evidence on optimal vasopressor titration targets, practice variations are expected.

In a recent survey, Canadian intensivists stated that they typically aim for a mean arterial pressure of 65 mmHg in patients suffering from septic shock(12). The survey also suggests that Canadian intensivists target higher blood pressures when patients present signs of malperfusion and that patients’ chronic comorbidities and acute concurrent illnesses influence their selection of blood pressure targets. However, differences may exist between actual practice and responses to a survey. The primary objectives of our study were to measure the proportion of patients with septic shock for whom physicians ordered vasopressors using explicit targets and to compare these with practice recommendations. We hypothesized that explicit blood pressure targets would be missing from half of the vasopressor prescriptions in participating centers. Secondary objectives were to describe the targets and their association with patients’ chronic comorbidites and acute concurrent illnesses.

## Patients and Methods:

### *Centers and patients*

We performed a retrospective cohort study in 9 university-affiliated intensive care units located in 3 tertiary care centers in Canada and Australia. None of the centers used standardized order forms for vasopressors. The study was approved by the hospitals' research ethics boards. Informed consent was waived for this retrospective chart audit.

We screened hospital databases for consecutive patients having received vasopressors and antibiotics. We included charts of patients who were 18 years or older and who were admitted to the ICU for a presumptive diagnosis of sepsis (regardless of the final diagnosis). The dominant diagnosis at the time of admission determined the presumptive source of infection in this study. To identify cases initially considered as septic shock, we relied on explicit statements found in the medical notes from the first day in the ICU. Other inclusion criteria were hypotension (systolic arterial pressure  $\leq 90$  mmHg or mean arterial pressure  $\leq 65$  mmHg) and continuous infusion of vasopressors for at least one hour within the initial 48 hours of ICU stay. We excluded patients who were treated outside the ICU (as the coronary care and stepdown units) and patients who, although they later developed septic shock, were initially admitted to the ICU for other reasons.

### *Data collection*

At each center, investigators manually reviewed every chart and extracted data using pre-piloted electronic forms with logical checks for extreme or missing values. Every investigator received a detailed instruction manual. We collected information about patient demographics, source of infection, Acute Physiology and Chronic Health Evaluation II (APACHE II) score(13) baseline chronic comorbidities, concurrent acute illnesses and targets for vasopressor titration. In order to capture all targets including those that may have been spoken instead of written by the medical team, we reviewed medical and nursing progress notes as well as written orders. We included vasopressor prescriptions made by any ICU team member within the initial 48 hours of ICU stay, but excluded prescriptions made before the patient was under the care of the intensivist (e.g. prescriptions written by the emergency physicians were excluded). To ensure data quality,

1 St-Arnaud et al. Prescribed targets for vasopressor titration in septic shock: a retrospective cohort study

2  
3 investigators received data queries when the automated data entry system identified extreme or  
4 missing values.  
5  
6

### 7 8 *Definitions*

9  
10 In this study, we defined vasopressors as any of the following medications administered for at  
11 least 1 hour: norepinephrine, epinephrine, vasopressin, dopamine and phenylephrine. We  
12 included every target specified during the initial 48 hours of ICU stay. Chronic comorbidities  
13 correspond to pathologies diagnosed before hospital admission (peripheral vascular disease,  
14 coronary artery disease, heart failure, chronic obstructive pulmonary disease, asthma,  
15 hypertension, diabetes mellitus, chronic renal failure, cirrhosis, obesity, neoplasia and  
16 immunosuppression). We classified new illnesses diagnosed within 48 hours of ICU admission  
17 as acute concurrent illnesses (stroke, myocardial injury, cardiac arrhythmia, acute pulmonary  
18 edema, acute respiratory distress syndrome, acute lung injury, massive hemorrhage, ischemic  
19 bowel disease, acute renal failure, maximal lactic acid  $\geq 4.0$ , and maximal INR  $\geq 2.0$ ). The  
20 supplementary appendix provides definitions for each comorbidity.  
21  
22  
23  
24  
25  
26  
27  
28  
29  
30

### 31 *Statistical analysis*

32  
33 We report continuous variables as means and 95% confidence intervals (CI) or medians and  
34 interquartile ranges and categorical variables as proportions. Charts with missing baseline  
35 creatinine were excluded from the denominator. We assumed patients to be free of specific  
36 comorbidities and acute illnesses when we found no report of these. For between center  
37 comparisons of continuous variables, we used ANOVA F-test. For between center comparisons  
38 of categorical data, we used Chi-square or Fisher's exact test when the sample sizes were small.  
39  
40  
41  
42  
43  
44  
45

46 To assess the association between chronic comorbidities and the first vasopressor titration target,  
47 we built a multivariable linear regression model with the first blood pressure target as the  
48 dependent variable. We introduced hospital center, admission APACHE II score, age, coronary  
49 artery disease, chronic heart failure, chronic hypertension, diabetes and chronic renal failure  
50 simultaneously as independent variables. In order to avoid overfitting, we ran this model strictly  
51 with targets expressed as a mean arterial pressure (MAP) since other targets like systolic arterial  
52 pressure (SAP) were rare. To assess the association between acute concurrent illnesses and  
53  
54  
55  
56  
57  
58  
59  
60

1 St-Arnaud et al. Prescribed targets for vasopressor titration in septic shock: a retrospective cohort study

2  
3 modifications of vasopressor titration targets, we built a multinomial logistic regression model  
4 with a 3-category dependent variable (initial blood pressure target decreased, unchanged or  
5 increased) using a random intercept to account extra variation among centers. Cases were  
6 included in this analysis if the initial blood pressure target was either not modified or modified  
7 numerically with no modification of the target variable (MAP to MAP or SAP to SAP). Acute  
8 renal failure, myocardial injury, serum lactate greater than 4 mmol/L and cardiac arrhythmia  
9 were the independent variables simultaneously introduced in the model.  
10  
11  
12  
13  
14  
15

### 16 17 *Sample size*

18 We assumed conservatively that we would find explicit targets for the titration of vasopressors in  
19 50% of the charts. Following this a priori assumption, a sample size of 235 patient charts would  
20 provide 117 explicit targets and greater than 90% power to detect a 3 mmHg difference between  
21 the mean of prescribed targets and current practice guidelines to target 65 mmHg. The number of  
22 chart reviewed by site was not preset. Investigators at each center proceeded at their own pace  
23 until the total number of included charts exceeded the planned sample size. The decision to  
24 terminate data extraction was made before analysing the data (without any knowledge of the  
25 results).  
26  
27  
28  
29  
30  
31  
32  
33  
34  
35  
36  
37  
38  
39  
40  
41  
42  
43  
44  
45  
46  
47  
48  
49  
50  
51  
52  
53  
54  
55  
56  
57  
58  
59  
60

## Results

We screened 5571 patient charts selecting 398 for manual review. We excluded 29 charts (figure 1) ultimately including data from 369 patients in the final analysis. Mean age was 65 years (95% CI 63 - 66), 53% were males and mean APACHE II score 27 (95% CI 26 - 28). Age and gender were not different between centers but mean APACHE II score was higher in center 2 (32, 95% CI 30-33) than in centers 1 (24, 95% CI 23-25) and 3 (24, 95% CI 22-26) ( $p < 0.0001$ ). The majority of patients were admitted directly from the emergency room (51%) and the lungs, the gastrointestinal tract and the genitourinary system were the most common sources of infection.

The most common chronic comorbidities (Table 1) were hypertension (56%), diabetes mellitus (31%) and coronary artery disease (31%). Although the type of chronic comorbidities encountered at the 3 sites varied, the total number of comorbidities per patient was similar across all centers (median 3; IQR 1-4). The most common acute concurrent illnesses (Table 2) were acute renal failure (61%), myocardial injury (35%), hyperlactatemia (35%) and acute respiratory distress syndrome or acute lung injury (31%). Again, we observed differences between centers. Overall, the median number of acute concurrent illnesses per patient in center 2 (3, IQR 2-4) was greater than in centers 1 (2, IQR 1-3) or 3 (2, IQR 1-3) ( $p < 0.0001$ ).

Table 3 presents specific targets for the titration of vasopressors. We found 604 explicit targets corresponding to the study period (within 48 hours of ICU admission). At least one explicit target was specified for 99% (365) of the patients. Most targets were values of MAP (73%), SAP (16%), a combination of MAP and SAP (8%). Table 4 presents other targets. None of the 604 prescriptions targeted urine output, lactate levels, mental status or central venous oxygen saturation. Of the 365 initial targets, 273 (75%) were MAPs. Overall, the initial MAP targets ranged from 55 to 90 mmHg and the median was 65 mmHg (IQR 65-70). Higher MAP values were initially targeted in center 3 (median MAP 70, IQR 70-75;  $p < 0.0001$  versus other centers). Table 5 presents the results of a multivariable linear regression model measuring the association between baseline variables and the value of initial MAP targets. The only variables associated with initial MAP values were age and hospital site with older age associated with high blood pressure targets. We found no association between the initial MAP value and the presence of chronic comorbidities.

St-Arnaud et al. Prescribed targets for vasopressor titration in septic shock: a retrospective cohort study

1  
2  
3  
4  
5 For 40% of the patients (n=148) the medical team modified the initial target at least once. In 54%  
6 of these (80 of 148) patients, the new target consisted of different values of the same blood  
7 pressure variable (MAP to MAP or SAP to SAP). We found that, of these modifications, 41%  
8 (33 of 80) represented an increase from the original prescription while 58% (47 of 80) were  
9 reductions in blood pressure (table 6). In a multivariable logistic regression, we found no  
10 association between the acute concurrent illnesses and target modifications in either direction  
11 (table 7).  
12  
13  
14  
15  
16  
17  
18  
19  
20  
21  
22  
23  
24  
25  
26  
27  
28  
29  
30  
31  
32  
33  
34  
35  
36  
37  
38  
39  
40  
41  
42  
43  
44  
45  
46  
47  
48  
49  
50  
51  
52  
53  
54  
55  
56  
57  
58  
59  
60

Confidential



## Discussion

In this multicenter retrospective study conducted in Australia and Canada, we found that an explicit titration target accompanied nearly every vasopressor prescription. A MAP value of 65 mmHg was the most frequent vasopressor titration target, though somewhat higher targets (typically 70 mmHg) were also common and the range was wide (55 to 90 mmHg). We found differences between centers in the prescribed blood pressure variables (MAP vs. SAP vs. combination of MAP and SAP) and in the blood pressure values. Our data suggest that physicians (and not other health professionals) intend to control the targets for vasopressor dosing adjustments. Older age and local culture (the center effect) are predictors of higher blood pressure targets. We found no association between chronic comorbidities and blood pressure targets. Clinicians often changed targets in the first 48 hours of ICU stay. A multivariable analysis identified no association between acute concurrent illnesses and the direction of target blood pressure modifications when they occurred (in either direction).

This study constitutes the only observational description of actual practices regarding the titration of vasopressors. The advantage of an observational approach, as opposed to a survey of stated practices, is that it allows highlighting discrepancies between actual practices and physicians' perceptions. Other strengths of our study include a data extraction process that involved rigorous manual review of every included chart as well as detailed instructions and pre-piloted electronic data forms with logical checks ensuring data integrity. The multicenter nature of the study improves the generalizability of our results.

Limitations include our reliance on information available in medical records. Chart completeness regarding chronic comorbidities and vasopressor titration targets as well as the intensity of diagnostic workups may have varied across participating centers and between patients. Although ultimately, the decision to include or exclude data from a given chart involved a careful manual review of eligibility criteria, different hospitals use different databases and the screening process may have resulted in different patient populations in different centers.

1 St-Arnaud et al. Prescribed targets for vasopressor titration in septic shock: a retrospective cohort study

2  
3 The data refuted our initial hypothesis that many vasopressor prescriptions would not follow  
4 explicit titration orders. Physicians apparently agree on the need to explicitly describe how to  
5 titrate vasopressors and this consistently involves setting a blood pressure target. The fact that  
6 chronic comorbidities, illness severity and individual acute concurrent illnesses are not  
7 associated with how physicians prescribe vasopressors in septic shock could mean that, contrary  
8 to perceptions and the results of a survey recently published by our group, these variables are not  
9 taken into consideration.(12) Alternately, they may play an important role in the selection of  
10 titration targets but this signal may disappear due to disagreement between physicians in their  
11 interpretation. The frequent target modifications suggest that physicians adjust vasopressors  
12 based on their perception of the patients' requirements. This implies that clinical decisions rely  
13 on surrogate endpoints although we could not identify them.  
14  
15  
16  
17  
18  
19  
20  
21  
22  
23

24 To the extent that vasopressors are potent medications with significant adverse effect profiles  
25 and that they are systematically prescribed to the most vulnerable patients, identifying a titration  
26 strategy that will maximise benefit and minimise harm constitutes a research priority. Future  
27 steps should involve 1) developing a better understanding of the rationale underlying vasopressor  
28 titration strategies in real time, 2) observing if actual blood pressures correspond to set targets, 3)  
29 validating that different titration strategies lead to predictable results regarding surrogate  
30 endpoints of organ perfusion and function and 4) comparing the effects of different titration  
31 strategies on clinically important endpoints. All of these objectives are best achieved with  
32 prospective studies.  
33  
34  
35  
36  
37  
38  
39  
40  
41  
42  
43  
44  
45  
46  
47  
48  
49  
50  
51  
52  
53  
54  
55  
56  
57  
58  
59  
60

## Conclusion

In treating patients with septic shock, intensivists from participating sites nearly always write prescriptions for vasopressors accompanied by explicit titration targets. These targets may vary with local standards more than with individual patient characteristics. Defining optimal vasopressor titration strategies adapted to individual patient characteristics demands randomized controlled trials.

Confidential

## References

1. Angus DC, Linde-Zwirble WT, Lidicker J, et al: Epidemiology of severe sepsis in the United States: analysis of incidence, outcome, and associated costs of care. *Crit Care Med* 2001; 29: 1303-1310.
2. Kumar G, Kumar N, Taneja A, et al: Nationwide trends of severe sepsis in the 21st century (2000-2007). *Chest* 2011; 140: 1223-1231.
3. Kirchheim HR, Ehmke H, Hackenthal E, et al: Autoregulation of renal blood flow, glomerular filtration rate and renin release in conscious dogs. *Pflugers Archiv - European Journal of Physiology* 1987; 410: 441-449.
4. Hollenberg SM: Vasopressor support in septic shock. *Chest* 2007; 132: 1678-1687.
5. Hollenberg SM: Vasoactive drugs in circulatory shock. *Am J Respir Crit Care Med* 2011; 183: 847-855.
6. Hollenberg SM, Ahrens TS, Annane D, et al: Practice parameters for hemodynamic support of sepsis in adult patients: 2004 update. *Critical Care Medicine* 2004; 32: 1928-1948.
7. Dellinger RP, Levy MM, Carlet JM, et al: Surviving Sepsis Campaign: international guidelines for management of severe sepsis and septic shock: 2008.[see comment][erratum appears in Crit Care Med. 2008 Apr;36(4):1394-6]. *Critical Care Medicine* 2008; 36: 296-327.
8. Bourgoin A, Leone M, Delmas A, et al: Increasing mean arterial pressure in patients with septic shock: effects on oxygen variables and renal function. *Crit Care Med* 2005; 33: 780-786.
9. Dunser MW, Ruokonen E, Pettila V, et al: Association of arterial blood pressure and vasopressor load with septic shock mortality: a post hoc analysis of a multicenter trial. *Crit Care* 2009; 13: R181.
10. LeDoux D, Astiz ME, Carpati CM, et al: Effects of perfusion pressure on tissue perfusion in septic shock. *Crit Care Med* 2000; 28: 2729-2732.
11. Subramanian S, Yilmaz M, Rehman A, et al: Liberal vs. conservative vasopressor use to maintain mean arterial blood pressure during resuscitation of septic shock: an observational study. *Intensive Care Med* 2008; 34: 157-162.
12. Lamontagne F, Cook DJ, Adhikari NK, et al: Vasopressor administration and sepsis: a survey of Canadian intensivists. *J Crit Care* 2011; 26: 532 e531-537.
13. Knaus WA, Draper EA, Wagner DP, et al: APACHE II: a severity of disease classification system. *Crit Care Med* 1985; 13: 818-829.

## Figure legend

Figure 1: Flow diagram of charts included for review.

Figure 2: Histograms of blood pressure targets.

Confidential

Table 1: Chronic comorbidities

|                                                                    | All Patients (n=369) | Centre 1 (n=174) | Centre 2 (n=114) | Centre 3 (n=81) | P     |
|--------------------------------------------------------------------|----------------------|------------------|------------------|-----------------|-------|
| <b>Hypertension % (N)</b>                                          | 56% (205)            | 51% (88)         | 66% (75)         | 52% (42)        | 0,03  |
| <b>Diabetes mellitus % (N)</b>                                     | 31% (115)            | 29% (51)         | 31% (35)         | 36% (29)        | 0,58  |
| <b>Coronary artery disease % (N)</b>                               | 31% (113)            | 30% (52)         | 38% (43)         | 22% (18)        | 0,07  |
| <b>Chronic obstructive pulmonary disease % (N)</b>                 | 26% (94)             | 28% (49)         | 21% (24)         | 26% (21)        | 0,4   |
| <b>Peripheral vascular disease % (N)</b>                           | 19% (71)             | 22% (38)         | 24% (27)         | 7% (6)          | 0,01  |
| <b>Immunosuppression % (N)</b>                                     | 18% (68)             | 17% (30)         | 11% (13)         | 31% (25)        | 0,002 |
| <b>Chronic renal failure % (N)</b>                                 | 18% (66)             | 14% (25)         | 13% (15)         | 32% (26)        | 0,001 |
| <b>Heart failure % (N)</b>                                         | 18% (65)             | 15% (26)         | 21% (24)         | 19% (15)        | 0,4   |
| <b>Neoplasia % (N)</b>                                             | 17% (64)             | 21% (36)         | 8% (9)           | 24% (19)        | 0,01  |
| <b>Cirrhosis % (N)</b>                                             | 8% (29)              | 5% (9)           | 11% (12)         | 10% (8)         | 0,19  |
| <b>Asthma % (N)</b>                                                | 4% (16)              | 2% (3)           | 3% (3)           | 12% (10)        | 0,001 |
|                                                                    |                      |                  |                  |                 |       |
| <b>Number of comorbidies per patient - median (IQR)</b>            | 3 (1 - 4)            | 2 (1 - 4)        | 3 (1 - 4)        | 3 (2 - 4)       | 0,97  |
| <b>Patients with no chronic comorbidity % (N)</b>                  | 10% (38)             | 12% (21)         | 11% (13)         | 5% (4)          | 0,19  |
| <b>Patients with <math>\geq 1</math> chronic comorbidity % (N)</b> | 90% (331)            | 88% (153)        | 89% (101)        | 95% (77)        | 0,19  |
| <b>Patients with <math>\geq 2</math> chronic comorbidity % (N)</b> | 71% (263)            | 67% (117)        | 70% (80)         | 81% (66)        | 0,06  |

Table 2: Concurrent acute illnesses

|                                                                         | All Patients (n=369) | Centre 1 (n=174) | Centre 2 (n=114) | Centre 3 (n=81) | P        |
|-------------------------------------------------------------------------|----------------------|------------------|------------------|-----------------|----------|
| <b>Acute renal failure % (N)</b>                                        | 61% (224)            | 62% (108)        | 72% (82)         | 42% (34)        | 0,0001   |
| <b>Myocardial infarction % (N)</b>                                      | 35% (128)            | 33% (57)         | 59% (67)         | 5% (4)          | < 0.0001 |
| <b>Maximal serum lactic acid <math>\geq</math> 4.0 % (N)</b>            | 35% (128)            | 24% (41)         | 48% (55)         | 40% (32)        | < 0.0001 |
| <b>ARDS/ALI % (N)</b>                                                   | 31% (115)            | 31% (53)         | 39% (44)         | 22% (18)        | 0,0499   |
| <b>Cardiac arrhythmia % (N)</b>                                         | 24% (89)             | 18% (32)         | 22% (25)         | 40% (32)        | 0,001    |
| <b>Maximal INR <math>\geq</math> 2.0 % (N)</b>                          | 23% (84)             | 14% (24)         | 34% (39)         | 26% (21)        | 0,0002   |
| <b>Acute pulmonary edema % (N)</b>                                      | 17% (61)             | 17% (29)         | 11% (13)         | 24% (19)        | 0,08     |
| <b>Massive hemorrhage % (N)</b>                                         | 13% (48)             | 21% (37)         | 9% (10)          | 1% (1)          | < 0.0001 |
| <b>Ischemic bowel disease % (N)</b>                                     | 6% (23)              | 8% (14)          | 4% (5)           | 5% (4)          | 0,46     |
| <b>Stroke % (N)</b>                                                     | 3% (10)              | 2% (4)           | 4% (5)           | 1% (1)          | 0,45     |
| <b>Number of acute illnesses per patient - median (IQR)</b>             | 2 (1 - 3)            | 2 (1 - 3)        | 3 (2 - 4)        | 2 (1 - 3)       | < 0.0001 |
| <b>Patients with no concurrent acute illness % (N)</b>                  | 9% (34)              | 9% (15)          | 4% (4)           | 19% (15)        | 0,002    |
| <b>Patients with <math>\geq</math> 1 concurrent acute illness % (N)</b> | 91% (335)            | 91% (159)        | 96% (110)        | 81% (66)        | 0,002    |
| <b>Patients with <math>\geq</math> 2 concurrent acute illness % (N)</b> | 72% (265)            | 70% (121)        | 85% (97)         | 58% (47)        | 0,0001   |

ARDS/ALI: acute respiratory distress syndrome or acute lung injury

INR: international normalized ratio

Table 3: Prescribed vasopressors targets

|                                                                 | All sites             | Centre 1              | Centre 2              | Centre 3              | P value  |
|-----------------------------------------------------------------|-----------------------|-----------------------|-----------------------|-----------------------|----------|
| <b>Number of patients</b>                                       | 369                   | 174                   | 114                   | 81                    | -        |
| <b>Total number of targets analyzed</b>                         | 604                   | 277                   | 176                   | 151                   | -        |
| <b>Patients with <math>\geq 1</math> target % (N), (95% CI)</b> | 99% (365), (98 - 100) | 99% (173), (97 - 100) | 99% (113), (95 - 100) | 98% (79), (94 - 100)  | 0,35     |
| <b>All targets</b>                                              |                       |                       |                       |                       | < 0.0001 |
| <b>SAP is only target % (N), (95% CI)</b>                       | 16% (95), (13 - 19)   | 7% (18), (4 - 9)      | 43% (75), (35 - 49)   | 1% (2), (0 - 3)       |          |
| <b>MAP is only target % (N), (95% CI)</b>                       | 73% (438), (69 - 76)  | 79% (220), (75 - 84)  | 39% (69), (33 - 47)   | 99% (149), (97 - 100) |          |
| <b>SAP and MAP combined % (N), (95% CI)</b>                     | 8% (50), (6 - 11)     | 14% (38), (10 - 18)   | 7% (12), (3 - 11)     | 0% (0), (0 - 0)       |          |
| <b>Other % (N), (95% CI)</b>                                    | 3% (21), (2 - 5)      | 0.4% (1), (0 - 2)     | 11% (20), (7 - 16)    | 0% (0), (0 - 0)       |          |
| <b>First target only</b>                                        |                       |                       |                       |                       | < 0.0001 |
| <b>SAP is only target % (N), (95% CI)</b>                       | 16% (58), (12 - 20)   | 4% (6), (1 - 6)       | 45% (51), (36 - 54)   | 1% (1), (0 - 4)       |          |
| <b>MAP is only target % (N), (95% CI)</b>                       | 75% (273), (70 - 79)  | 83% (144), (78 - 89)  | 45% (51), (36 - 54)   | 99% (78), (96 - 100)  |          |
| <b>SAP and MAP combined % (N), (95% CI)</b>                     | 7% (27), (5 - 10)     | 13% (23), (8 - 18)    | 4% (4), (0 - 7)       | 0% (0), (0 - 0)       |          |
| <b>Other % (N), (95% CI)</b>                                    | 2% (7), (1 - 3)       | 0% (0), (0 - 0)       | 6% (7), (3 - 12)      | 0% (0), (0 - 0)       |          |
| <b>Target value (first targets only)</b>                        |                       |                       |                       |                       |          |
| <b>SAP only - median mmHg (N), (IQR)</b>                        | 100 (58), (90 - 100)  | 100 (6), (90 - 100)   | 100 (51), (90 - 100)  | 120 (1), (120 - 120)  | 0,04     |
| <b>MAP only - median mmHg (N), (IQR)</b>                        | 65 (273), (65 - 70)   | 65 (144), (65 - 65)   | 65 (51), (65 - 70)    | 70 (78), (70 - 75)    | < 0.0001 |



Table 4: Other vasopressor titration targets

|                                                    | <b>All sites</b> |
|----------------------------------------------------|------------------|
| <b>Blood pressure range % (N)</b>                  | 2% (15)          |
| <b>Systemic vascular index of resistance % (N)</b> | 0.5% (3)         |
| <b>Heart rate &gt; 50 bpm % (N)</b>                | 0.2% (1)         |
| <b>Heart rate &gt; 95 bpm % (N)</b>                | 0.2% (1)         |
| <b>Dopamine at fixed "renal" dose % (N)</b>        | 0.2% (1)         |

Confidential

1  
2  
3  
4  
5  
6  
7  
8  
9  
10  
11  
12  
13  
14  
15  
16  
17  
18  
19  
20  
21  
22  
23  
24  
25  
26  
27  
28  
29  
30  
31  
32  
33  
34  
35  
36  
37  
38  
39  
40  
41  
42  
43  
44  
45  
46  
47  
48  
49

Confidential

Table 5: Multivariable analysis of the association between the first prescribed MAP target as a continuous value and the patients' baseline comorbidities

| <b>Multivariable model comparing the first prescribed MAP target as a continuous value with patients' baseline comorbidities</b> |                         |                |
|----------------------------------------------------------------------------------------------------------------------------------|-------------------------|----------------|
| <b>Parameters</b>                                                                                                                | <b>Estimate (95%CI)</b> | <b>P value</b> |
| <b>Centre* 1 vs 3</b>                                                                                                            | - 6.93 (-7.94 ~ 5.92)   | < 0.0001       |
| <b>Centre 2 vs 3</b>                                                                                                             | - 4.37 (-5.74 ~ -3.00)  | < 0.0001       |
| <b>APACHE II score</b>                                                                                                           | -0.02 (-0.07~0.04)      | 0.54           |
| <b>Age</b>                                                                                                                       | 0.04 (0.01~0.07)        | 0.01           |
| <b>Coronary artery disease</b>                                                                                                   | 0.40(-0.68 ~ 1.47)      | 0.47           |
| <b>Chronic heart failure</b>                                                                                                     | -0.48 (-1.69 ~ 0.72)    | 0.43           |
| <b>Hypertension</b>                                                                                                              | -0.17 (-1.15 ~ 0.80 )   | 0.72           |
| <b>Diabetes</b>                                                                                                                  | 0.08 (-0.87 ~ 1.04)     | 0.86           |
| <b>Chronic renal failure</b>                                                                                                     | -1.11 (-2.26 ~ 0.04)    | 0.06           |

R-square=0.43

Table 6: Modifications to initial targets

1  
2  
3  
4  
5  
6  
7  
8  
9  
10  
11  
12  
13  
14  
15  
16  
17  
18  
19  
20  
21  
22  
23  
24  
25  
26  
27  
28  
29  
30  
31  
32  
33  
34  
35  
36  
37  
38  
39  
40  
41  
42  
43  
44  
45  
46  
47  
48  
49

|                                                                                                                       | All sites             |
|-----------------------------------------------------------------------------------------------------------------------|-----------------------|
| <b>Number of patients</b>                                                                                             | 369                   |
| <b>Total number of targets analyzed</b>                                                                               | 604                   |
| <b>Patients with at least one explicit target % (N), (95% CI)</b>                                                     | 99% (365), (98 - 100) |
| <b>Target modifications</b>                                                                                           |                       |
| <b>Patients with 0 modification (only 1 target) % (N)</b>                                                             | 54% (199)             |
| <b>Patients with at least one modification of initial target % (N)</b>                                                | 40% (148)             |
| <b>Direction of target modifications</b>                                                                              |                       |
| <b>Proportion of target changes in the same category that represent an <u>INCREASE</u> in the target value %, (N)</b> | 41% (33)              |
| <b>SAP - SAP increase - median mmHg (IQR)</b>                                                                         | +10 (10 , 10)         |
| <b>MAP - MAP increase - median mmHg (IQR)</b>                                                                         | +5 (5 , 5)            |
| <b>Proportion of target changes in the same category that represent a <u>DECREMENT</u> in target value</b>            | 58% (47)              |
| <b>SAP - SAP decrease - median mmHg (IQR)</b>                                                                         | -10 (-15 , -7.5)      |
| <b>MAP - MAP decrease - median mmHg (IQR)</b>                                                                         | -5 (-5, -5)           |

Initial

Table 7: Multivariable logistical model measuring the association between concurrent acute illnesses and the direction of blood pressure target modifications

| <b>Logistic regression (N = 277)</b>                                |                                                                   |                |
|---------------------------------------------------------------------|-------------------------------------------------------------------|----------------|
|                                                                     | <b>OR - SAP or MAP increased<br/>(n=33) vs. no change (n=197)</b> | <b>P value</b> |
| <b>Acute renal failure vs. NO acute renal failure</b>               | 1.46 (0.65, 3.28)                                                 | 0,36           |
| <b>Myocardial infarction vs. no myocardial infarction</b>           | 1.06 (0.43, 2.64)                                                 | 0,9            |
| <b>Lactic acid greater than 4 vs. NO lactic acid greater than 4</b> | 0.75 (0.32, 1.78)                                                 | 0,52           |
| <b>Cardiac arrhythmia vs. NO arrhythmia</b>                         | 0.97 (0.39, 3.27)                                                 | 0,94           |
|                                                                     |                                                                   |                |
|                                                                     | <b>OR - SAP or MAP decreased<br/>(n=47) vs. no change</b>         | <b>P value</b> |
| <b>Acute renal failure vs. NO acute renal failure</b>               | 1.19 (0.60, 2.39)                                                 | 0,61           |
| <b>Myocardial infarction vs. no myocardial infarction</b>           | 0.68 (0.30, 1.52)                                                 | 0,35           |
| <b>Lactic acid greater than 4 vs. NO lactic acid greater than 4</b> | 1.44 (0.72, 2.88)                                                 | 0,31           |
| <b>Cardiac arrhythmia vs. NO arrhythmia</b>                         | 1.15 (0.54, 2.45)                                                 | 0,71           |

\*p-value for site effect=0.36

1  
2  
3  
4  
5  
6  
7  
8  
9  
10  
11  
12  
13  
14  
15  
16  
17  
18  
19  
20  
21  
22  
23  
24  
25  
26  
27  
28  
29  
30  
31  
32  
33  
34  
35  
36  
37  
38  
39  
40  
41  
42  
43  
44  
45  
46  
47  
48  
49  
50  
51  
52  
53  
54  
55  
56  
57  
58  
59  
60

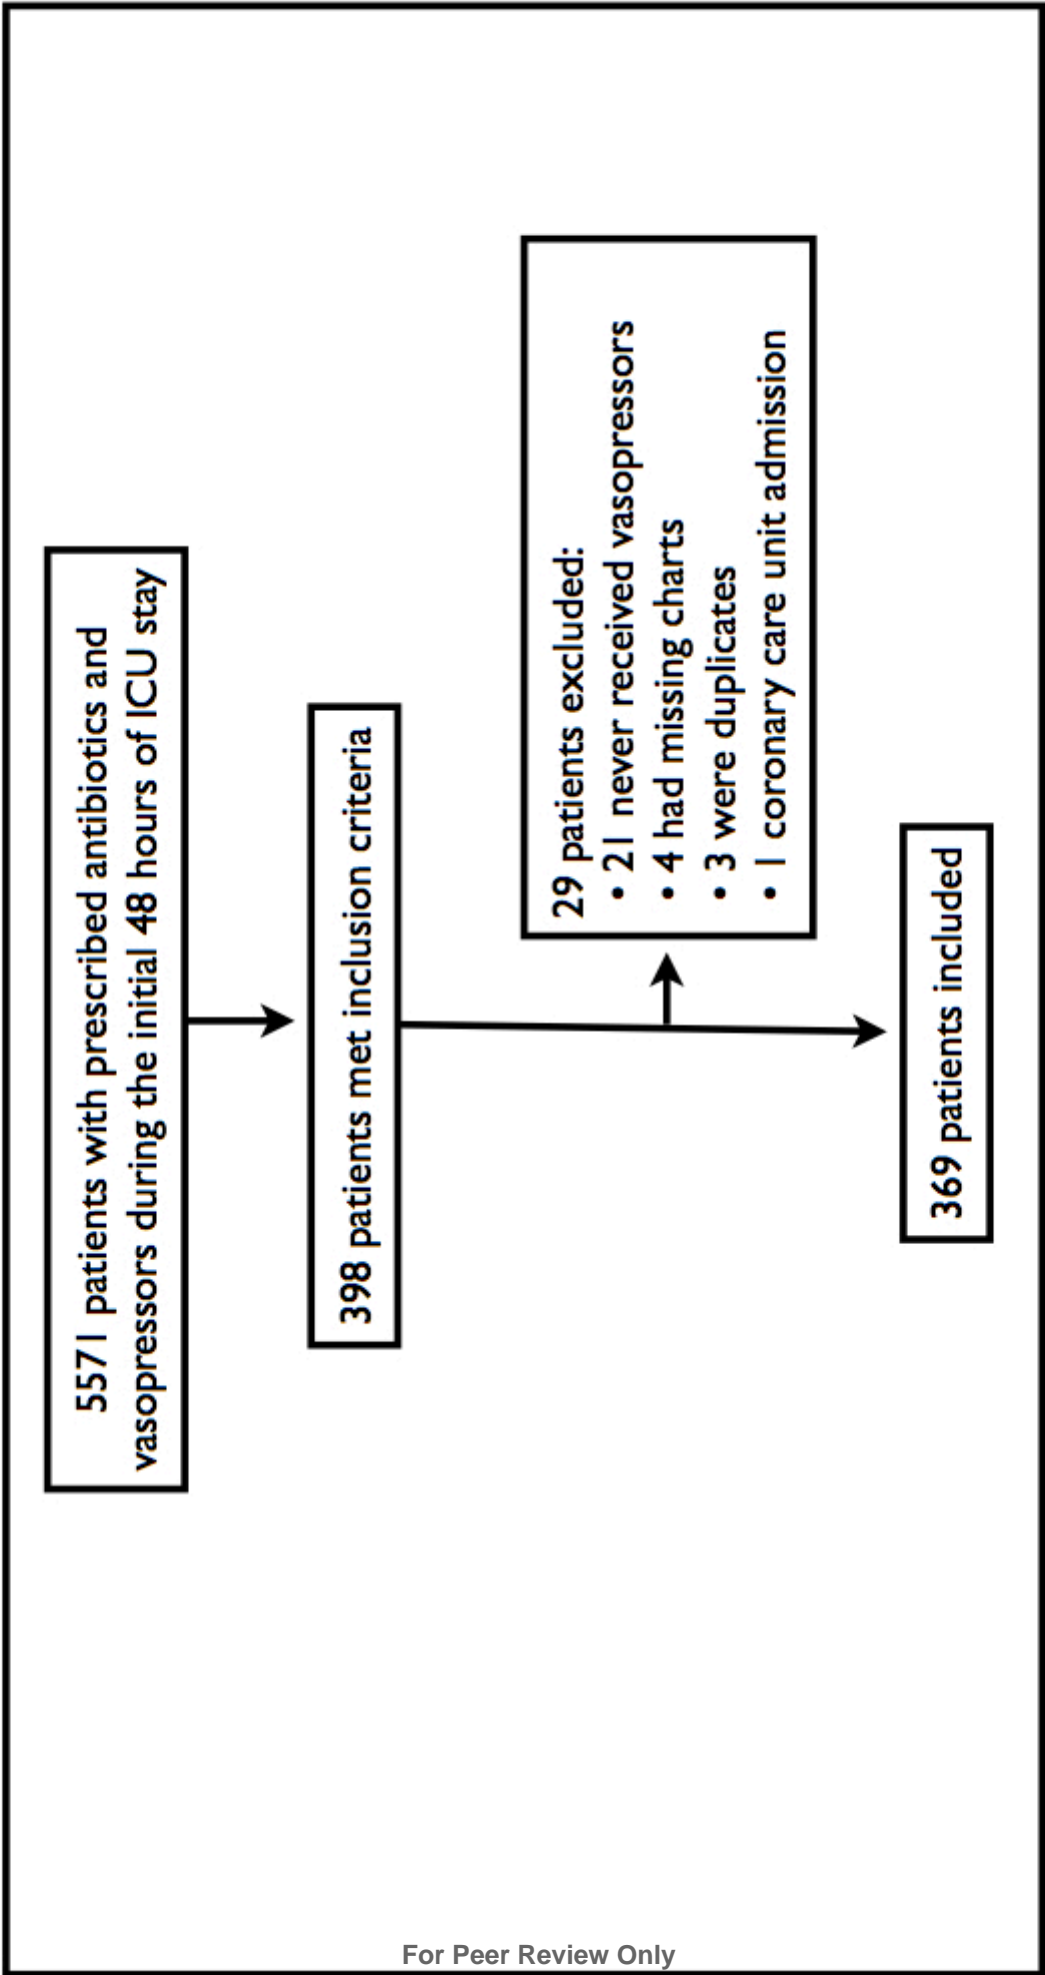

1  
2  
3  
4  
5  
6  
7  
8  
9  
10  
11  
12  
13  
14  
15  
16  
17  
18  
19  
20  
21  
22  
23  
24  
25  
26  
27  
28  
29  
30  
31  
32  
33  
34  
35  
36  
37  
38  
39  
40  
41  
42  
43

All sites - First targets - MAP targets

All sites - First targets - SAP targets

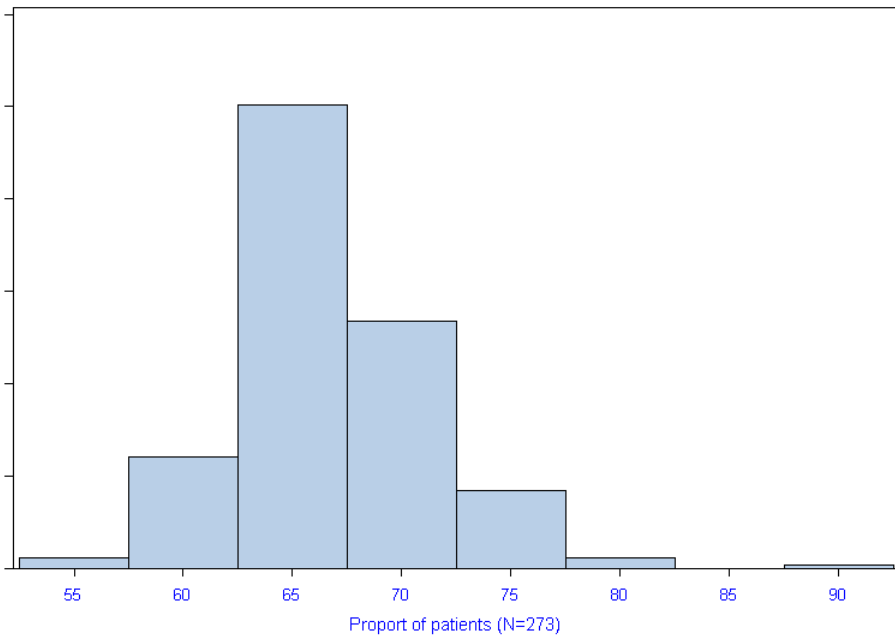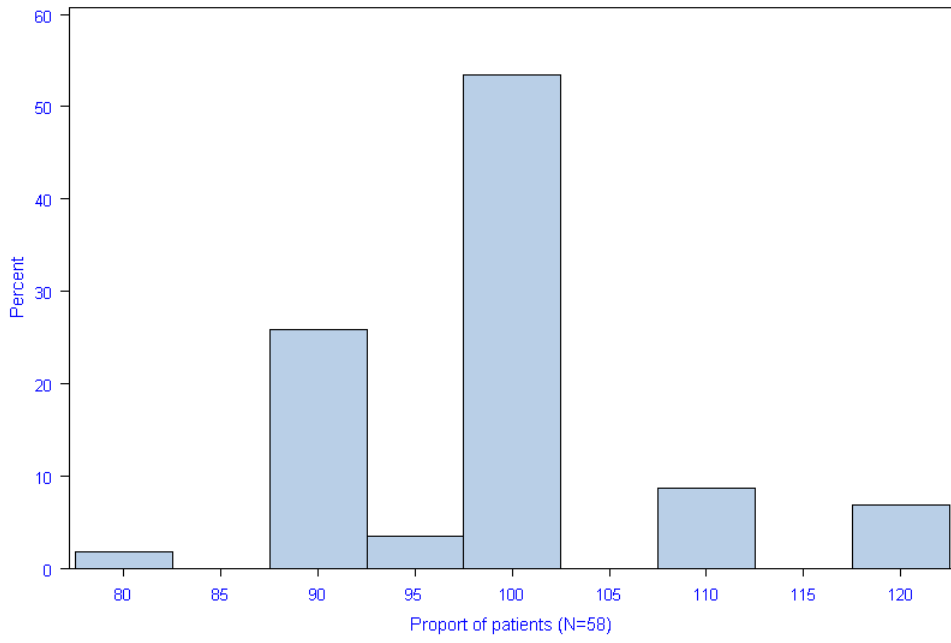

## Supplementary appendix

### *Chronic comorbidities*

Any comorbidity present upon hospital admission prior to the development of septic shock

- Peripheral vascular disease: history of stroke, transient ischemic attack, thoracic or abdominal aortic surgery, peripheral arterial bypass surgery, peripheral angioplasty, claudication.
- Coronary artery disease: history of myocardial infarction, coronary angioplasty, coronary artery bypass, coronary artery stenosis  $\geq 50\%$  measured during coronarography.
- Heart failure: cardiac ejection fraction  $\leq 50\%$  or diastolic dysfunction on echocardiography.
- Chronic obstructive pulmonary disease: FEV1  $\leq 80\%$  and FEV1/FVC  $\leq 0.7$ .
- Asthma: Methacholine challenge positive/FEV1 variation  $\geq 12\%/180\text{ml}$  after bronchodilators.
- Hypertension: history of hypertension or any patient receiving more than 3 anti-hypertensive medications; included anti-hypertensive medications are beta-blockers, alpha blockers, alpha2 agonists, ACEi, ARB, renin inhibitor, calcium channel blockers, loop diuretics, thiazide diuretics, potassium sparing diuretics, vasodilators.
- Diabetes mellitus: use of oral hypoglycemic medications (metformine, glyburide, chlorpropamide, tolbutamide, glimepiride, gliclazide, repaglinide, nateglinide, acarbose, rosiglitazone, pioglitazone) or use of insulin.
- Chronic renal failure: defined according to the recommendations of the “National Kidney Foundation Kidney Disease Outcomes Quality Initiative (NKF KDOQI)”: estimated glomerular clearance  $\leq 60\text{ml}/\text{min}$  as per the MDRD method; patients on chronic dialysis are automatically included.
- Cirrhosis: proven cirrhosis on hepatic biopsy, child B or C cirrhosis, history of hepatic encephalopathy or history of upper gastrointestinal tract hemorrhage secondary to esophageal/gastric variceal bleeding.
- Active neoplasia: any patient diagnosed with neoplasia within 5 years prior to admission or any patient having received chemotherapy/radiotherapy within 5 years prior to admission.



St-Arnaud et al. Prescribed targets for vasopressor titration in septic shock: a retrospective cohort study

- Immunosuppression: any patient receiving an immunosuppressant agent. Any patient having received a form of chemotherapy within 6 weeks prior to admission. Any patient known with a hematologic neoplasia (lymphoma or leukemia). Any patient having a past history of solid organ transplantation or bone marrow transplantation (excluding corneal transplant). Any HIV + patient. Immunosuppressant agents are 6-mercaptopurine, azathioprine, systemic corticosteroid (prednisone, hydrocortisone, methylprednisolone, dexamethasone), methotrexate, cyclosporine, cyclophosphamide, hydroxychloroquine, mycophenolate mofetil, AntiTNF (infliximab, adalimumab, etanercept, certolizumab pegol), anakinra, rituximab.

#### *Concurrent acute illnesses*

Any organ insult or complication occurring within the initial 48 hours of ICU admission.

Included if present upon ICU admission.

- Myocardial injury: serum troponins above upper limit of normal and above baseline value if available.
- Cardiac arrhythmia: history of atrial fibrillation, atrial flutter, supraventricular tachycardia, ventricular tachycardia, ventricular fibrillation, torsade de pointes. Chronic atrial fibrillation or atrial flutter is not considered an acute comorbidity.
- Acute pulmonary edema: diagnosis written in the progress notes and with at least 1 objective element present (lung imaging suggestive of edema, improvement after diuretics/dialysis, left heart failure on cardiac echocardiography).
- ARDS/ALI:  $\text{PaO}_2/\text{FiO}_2 \leq 300\text{mmHg}$  with bilateral lung infiltrates on a chest x-ray. Use the radiologist's interpretation of the chest x-ray.
- Massive hemorrhage: deadly bleed or a symptomatic bleed in a critical region or organ (intracranial, spinal, ocular, retroperitoneal, articular, pericardial, or intramuscular with compartment syndrome) or bleed causing a  $\downarrow$  Hb 20g/l or leading to a transfusion of  $\geq 2$  units of packed RBCs.
- Ischemic or hemorrhagic stroke proven on head CT/MRI. If the symptoms were present during the study period but imaging was done within 24 hours after the end of the study period, the event is included.

- 1  
2  
3  
4  
5  
6  
7  
8  
9  
10  
11  
12  
13  
14  
15  
16  
17  
18  
19  
20  
21  
22  
23  
24  
25  
26  
27  
28  
29  
30  
31  
32  
33  
34  
35  
36  
37  
38  
39  
40  
41  
42  
43  
44  
45  
46  
47  
48  
49  
50  
51  
52  
53  
54  
55  
56  
57  
58  
59  
60
- Ischemic bowel disease: clinical suspicion mentioned in the progress notes and supported by a radiology exam (abdominal CT, abdominal angiography), endoscopic exam, or by operating room (OR) findings. OR findings are included if surgery performed immediately before the ICU admission.
  - Acute renal failure: hemodialysis or CVVH in the ICU or a serum creatinine  $\uparrow$  1.5X baseline value or urine output  $\leq 0.5\text{ml/kg/hr}$   $\times \geq 6$  hours or serum creatinine  $\geq 350$   $\mu\text{mol/L}$  (only if new creatinine is  $\geq 44$   $\mu\text{mol/L}$  compared to baseline value).
  - Maximal INR  $> 2.0$ . If the patient was on vitamin K antagonist with a therapeutic INR ( $> 2.0$ ) prior to ICU admission, we do not consider this as being an acute comorbidity.

Confidential

## STROBE Statement; Checklist for Prescribed targets for vasopressor titration in septic shock: aretrospective cohort study

|                              | Item No | Recommendation                                                                                                                                                                       | Checklist                                                   |
|------------------------------|---------|--------------------------------------------------------------------------------------------------------------------------------------------------------------------------------------|-------------------------------------------------------------|
| Title and abstract           | 1       | (a) Indicate the study's design with a commonly used term in the title or the abstract                                                                                               | √                                                           |
|                              |         | (b) Provide in the abstract an informative and balanced summary of what was done and what was found                                                                                  | √                                                           |
| <b>Introduction</b>          |         |                                                                                                                                                                                      |                                                             |
| Background/rationale         | 2       | Explain the scientific background and rationale for the investigation being reported                                                                                                 | √                                                           |
| Objectives                   | 3       | State specific objectives, including any prespecified hypotheses                                                                                                                     | √                                                           |
| <b>Methods</b>               |         |                                                                                                                                                                                      |                                                             |
| Study design                 | 4       | Present key elements of study design early in the paper                                                                                                                              | √                                                           |
| Setting                      | 5       | Describe the setting, locations, and relevant dates, including periods of recruitment, exposure, follow-up, and data collection                                                      | <input type="checkbox"/><br>(period of recruitment missing) |
| Participants                 | 6       | (a) Give the eligibility criteria, and the sources and methods of selection of participants. Describe methods of follow-up                                                           | √<br>(Follow up NA)                                         |
|                              |         | (b) For matched studies, give matching criteria and number of exposed and unexposed                                                                                                  | NA                                                          |
| Variables                    | 7       | Clearly define all outcomes, exposures, predictors, potential confounders, and effect modifiers. Give diagnostic criteria, if applicable                                             | √                                                           |
| Data sources/<br>measurement | 8*      | For each variable of interest, give sources of data and details of methods of assessment (measurement). Describe comparability of assessment methods if there is more than one group | √                                                           |
| Bias                         | 9       | Describe any efforts to address potential sources of bias                                                                                                                            | √                                                           |
| Study size                   | 10      | Explain how the study size was arrived at                                                                                                                                            | √                                                           |
| Quantitative variables       | 11      | Explain how quantitative variables were handled in the analyses. If applicable, describe which groupings were chosen and why                                                         | √                                                           |
| Statistical methods          | 12      | (a) Describe all statistical methods, including those used to control for confounding                                                                                                | √                                                           |
|                              |         | (b) Describe any methods used to examine subgroups and interactions                                                                                                                  | √                                                           |
|                              |         | (c) Explain how missing data were addressed                                                                                                                                          | √                                                           |
|                              |         | (d) If applicable, explain how loss to follow-up was addressed                                                                                                                       | NA                                                          |
|                              |         | (e) Describe any sensitivity analyses                                                                                                                                                | NA                                                          |
| <b>Results</b>               |         |                                                                                                                                                                                      |                                                             |

|                          |     |                                                                                                                                                                                                                       |                                                                                                     |
|--------------------------|-----|-----------------------------------------------------------------------------------------------------------------------------------------------------------------------------------------------------------------------|-----------------------------------------------------------------------------------------------------|
| Participants             | 13* | (a) Report numbers of individuals at each stage of study—<br>eg numbers potentially eligible, examined for eligibility,<br>confirmed eligible, included in the study, completing<br>follow-up, and analysed           | √<br>(Details in figure<br>1)                                                                       |
|                          |     | (b) Give reasons for non-participation at each stage                                                                                                                                                                  | √                                                                                                   |
|                          |     | (c) Consider use of a flow diagram                                                                                                                                                                                    | √                                                                                                   |
| Descriptive data         | 14* | (a) Give characteristics of study participants (eg<br>demographic, clinical, social) and information on<br>exposures and potential confounders                                                                        | √                                                                                                   |
|                          |     | (b) Indicate number of participants with missing data for<br>each variable of interest                                                                                                                                | No missing data<br>for primary<br>outcome; missing<br>baseline<br>creatinine values<br>not reported |
|                          |     | (c) Summarise follow-up time (eg, average and total<br>amount)                                                                                                                                                        | NA                                                                                                  |
| Outcome data             | 15* | Report numbers of outcome events or summary measures<br>over time                                                                                                                                                     | √                                                                                                   |
| Main results             | 16  | (a) Give unadjusted estimates and, if applicable,<br>confounder-adjusted estimates and their precision (eg,<br>95% confidence interval). Make clear which confounders<br>were adjusted for and why they were included | √                                                                                                   |
|                          |     | (b) Report category boundaries when continuous variables<br>were categorized                                                                                                                                          | √                                                                                                   |
|                          |     | (c) If relevant, consider translating estimates of relative<br>risk into absolute risk for a meaningful time period                                                                                                   | NA                                                                                                  |
| Other analyses           | 17  | Report other analyses done—eg analyses of subgroups<br>and interactions, and sensitivity analyses                                                                                                                     | √                                                                                                   |
| <b>Discussion</b>        |     |                                                                                                                                                                                                                       |                                                                                                     |
| Key results              | 18  | Summarise key results with reference to study objectives                                                                                                                                                              | √                                                                                                   |
| Limitations              | 19  | Discuss limitations of the study, taking into account<br>sources of potential bias or imprecision. Discuss both<br>direction and magnitude of any potential bias                                                      |                                                                                                     |
| Interpretation           | 20  | Give a cautious overall interpretation of results<br>considering objectives, limitations, multiplicity of<br>analyses, results from similar studies, and other relevant<br>evidence                                   | √                                                                                                   |
| Generalisability         | 21  | Discuss the generalisability (external validity) of the study<br>results                                                                                                                                              | √                                                                                                   |
| <b>Other information</b> |     |                                                                                                                                                                                                                       |                                                                                                     |
| Funding                  | 22  | Give the source of funding and the role of the funders for<br>the present study and, if applicable, for the original study<br>on which the present article is based                                                   | No funding<br>provided for this<br>study                                                            |

\*Give information separately for exposed and unexposed groups.

**Note:** An Explanation and Elaboration article discusses each checklist item and gives methodological background and published examples of transparent reporting. The STROBE checklist is best used in conjunction with this article (freely

1  
2 available on the Web sites of PLoS Medicine at <http://www.plosmedicine.org/>, Annals of Internal Medicine at  
3 <http://www.annals.org/>, and Epidemiology at <http://www.epidem.com/>). Information on the STROBE Initiative is  
4 available at <http://www.strobe-statement.org>.  
5  
6  
7  
8  
9  
10  
11  
12  
13  
14  
15  
16  
17  
18  
19  
20  
21  
22  
23  
24  
25  
26  
27  
28  
29  
30  
31  
32  
33  
34  
35  
36  
37  
38  
39  
40  
41  
42  
43  
44  
45  
46  
47  
48  
49  
50  
51  
52  
53  
54  
55  
56  
57  
58  
59  
60

Confidential
